# Supplementary material for: Peptide-functionalized NaGdF4 nanoparticles for tumor-targeted magnetic resonance imaging and effective therapy
Source: Royal Society of Chemistry journal article supplement (doi:10.1039/c9ra02135c), 2019-01-01
Supplement: c9ra02135c1.pdf [file c9ra02135c1.pdf]

**Electronic Supplementary Information (ESI) for:**  
**Peptide-Functionalized NaGdF<sub>4</sub> Nanoparticles for Tumor-  
Targeted Magnetic Resonance Imaging and Effective Therapy**

Yixin Chen<sup>a</sup>, Yu Fu<sup>a</sup>, Xiaodong Li<sup>a</sup>, Hongda Chen<sup>\*b</sup>, Zhenxin Wang,<sup>b</sup> Huimao Zhang<sup>\*a</sup>

<sup>a</sup>Department of Radiology, the First Hospital of Jilin University, Changchun 130021, P. R. China. E-mail: huimaozhanglinda@163.com (HZ); Fax: (+86) 431-88783300.

<sup>b</sup>State Key Laboratory of Electroanalytical Chemistry, Changchun Institute of Applied Chemistry, Chinese Academy of Sciences, Changchun, 130022, P. R. China. E-mail: chenhongda@ciac.ac.cn (HC); Fax: (+86) 431-85262756.

**Contents**

- 1. Additional Figures S1-S5.**
- 2. Additional Table S1.**

## 1. Additional Figures

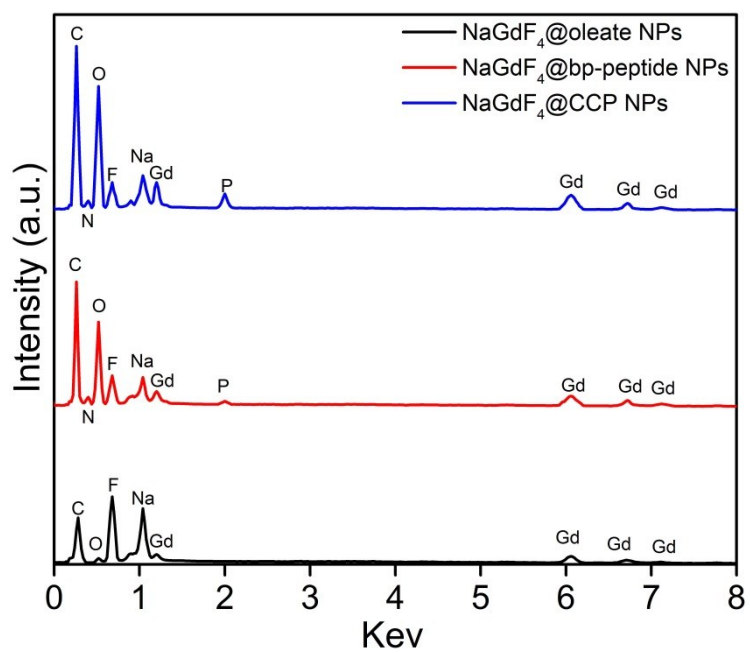

Fig. S1 EDS spectra of as-prepared nanoparticles.

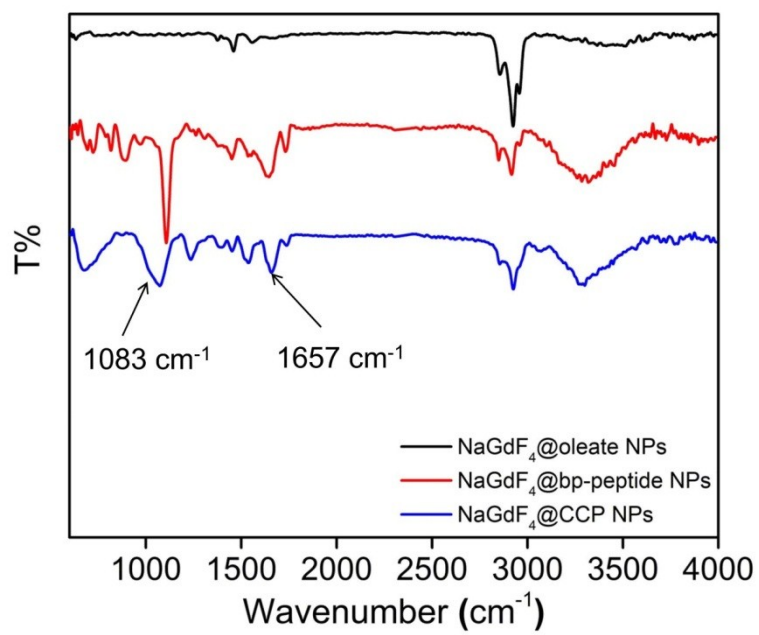

**Fig. S2** FTIR spectra of as-prepared nanoparticles.

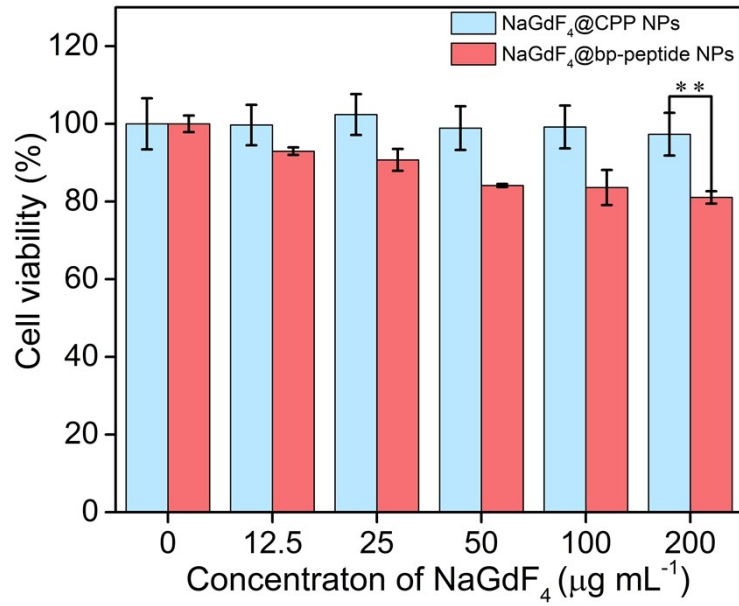

**Fig. S3** Cell viabilities of 293 cells after incubated with various concentrations of NaGdF<sub>4</sub>@bp-peptide NPs and NaGdF<sub>4</sub>@CPP NPs for 24 h, respectively (n=5, \*\*P<0.01 from an analysis of variance with Tukey's post-test).

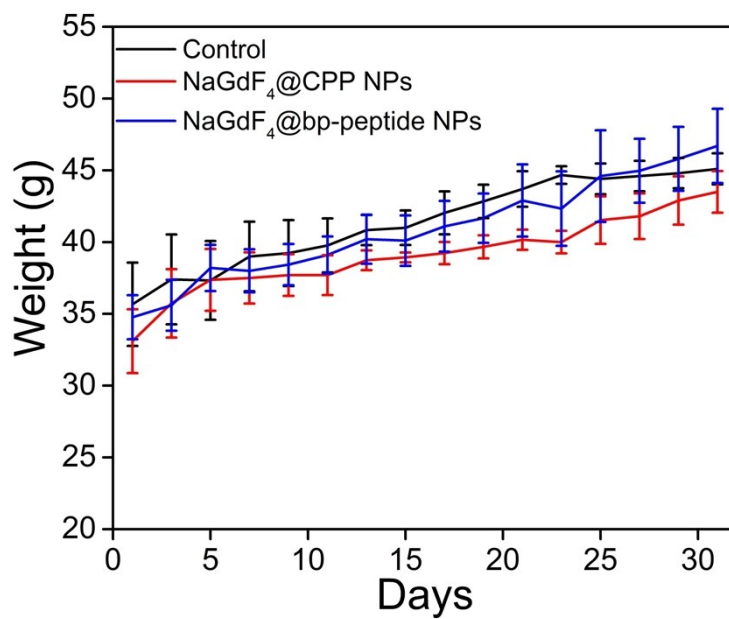

**Fig. S4** Body weight changes of the health Kunming mice with and without intravenous injection of NaGdF<sub>4</sub>@bp-peptide NPs and NaGdF<sub>4</sub>@CPP NPs (10 mg Gd kg<sup>-1</sup> body weight) versus time.

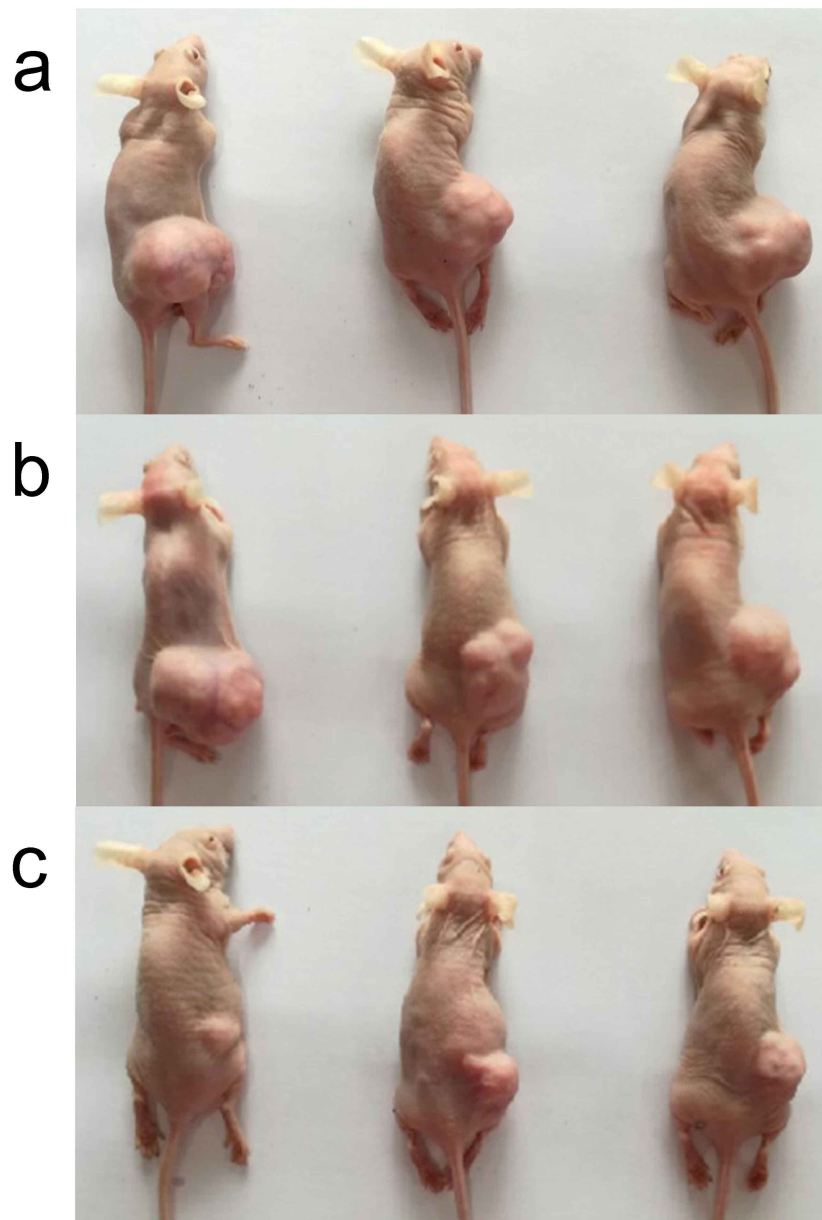

**Fig. S5** Digital photographs of Balb/c nude mice after different intravenous treatments. (a) Control, (b) NaGdF<sub>4</sub>@CPP NPs and (c) NaGdF<sub>4</sub>@bp-peptide NPs (10 mg Gd kg<sup>-1</sup> body weight), respectively.

## 2. Additional Table

Table S1. Blood routine analysis of mice at 1 day, 7 day and 31 day of post-injection.

| Test (1 day) | Units                | Control | NaGdF <sub>4</sub> @CPP NPs | NaGdF <sub>4</sub> @bp-peptide NPs |
|--------------|----------------------|---------|-----------------------------|------------------------------------|
| WBC          | ×10 <sup>9</sup> /L  | 4.50    | 5.70                        | 3.20                               |
| RBC          | ×10 <sup>12</sup> /L | 7.75    | 8.14                        | 6.44                               |
| HGB          | g/L                  | 108     | 118                         | 93                                 |
| LY           | %                    | 62.3    | 65.6                        | 69.9                               |
| MCH          | pg                   | 13.9    | 14.4                        | 14.4                               |
| MCHC         | g/L                  | 350     | 332                         | 349                                |
| MCV          | fL                   | 39.8    | 43.7                        | 41.4                               |
| PLT          | ×10 <sup>9</sup> /L  | 446     | 442                         | 1.08×10 <sup>3</sup>               |
| PDW          | fL                   | 14.6    | 14.9                        | 14.0                               |

  

| Test(7 day) | Units                | Control | NaGdF <sub>4</sub> @CPP NPs | NaGdF <sub>4</sub> @bp-peptide NPs |
|-------------|----------------------|---------|-----------------------------|------------------------------------|
| WBC         | ×10 <sup>9</sup> /L  | 6.30    | 6.40                        | 5.90                               |
| RBC         | ×10 <sup>12</sup> /L | 8.70    | 8.54                        | 8.83                               |
| HGB         | g/L                  | 135     | 120                         | 130                                |
| LY          | %                    | 60.3    | 61.8                        | 62.9                               |
| MCH         | pg                   | 15.5    | 14.0                        | 14.7                               |
| MCHC        | g/L                  | 338     | 353                         | 344                                |
| MCV         | fL                   | 45.9    | 39.7                        | 42.8                               |
| PLT         | ×10 <sup>9</sup> /L  | 528     | 490                         | 563                                |
| PDW         | fL                   | 14.0    | 15.0                        | 13.2                               |

  

| Test (31 day) | Units                | Control | NaGdF <sub>4</sub> @CPP NPs | NaGdF <sub>4</sub> @bp-peptide NPs |
|---------------|----------------------|---------|-----------------------------|------------------------------------|
| WBC           | ×10 <sup>9</sup> /L  | 4.90    | 4.80                        | 3.90                               |
| RBC           | ×10 <sup>12</sup> /L | 6.94    | 7.24                        | 6.15                               |
| HGB           | g/L                  | 112     | 110                         | 98.0                               |
| LY            | %                    | 60.5    | 62.3                        | 62.8                               |
| MCH           | pg                   | 11.8    | 12.5                        | 13.7                               |
| MCHC          | g/L                  | 342     | 314                         | 338                                |
| MCV           | fL                   | 35.8    | 42.8                        | 40.8                               |
| PLT           | ×10 <sup>9</sup> /L  | 441     | 435                         | 477                                |
| PDW           | fL                   | 14.9    | 13.8                        | 13.6                               |
